# Supplementary material for: Reverse Genetics in Candida albicans Predicts ARF Cycling Is Essential for Drug Resistance and Virulence
Source: PLoS Pathog. 2010 Feb 5;6(2):e1000753. doi: 10.1371/journal.ppat.1000753 (PMC2816695; doi:10.1371/journal.ppat.1000753)
Supplement: Table S5 — Fluconazole (FCZ) responsive genes as identified by microarray analysis. (0.07 MB XLS) [file ppat.1000753.s009.xls]

## Sheet: Sheet1
Table S5
Fluconazole (FCZ) responsive genes as identified by microarray analysis.
The genes shown here were significantly regulated (>2 fold, p-value < 0.05) in WT-FCZ-treated cells and combined with genes that were significantly regulated (>2 fold, p-value < 0.05) in age3-FCZ-treated cells. This list was also used to illustrate the Cluster tree and Venn diagram in Figure S3A.
FCZ responsive genes are color coded:
Red indicates transcript levels > 4.0; orange indicates transcript levels < 4.0 and > 2;
Dark green indicates transcript levels < 0.5 and > 0.3; pale green indicates transcript levels < 0.3.
age3+FCZ vs WT+FCZ	WT+FCZ vs WT	age3 vs WT	age3+FCZ vs age3	common name	systematic name	description
7.29321	8.74193	7.58436	6.64314	DDR48	orf19.4082	Immunogenic stress-associated protein; regulated by filamentous growth pathways; induced by benomyl, caspofungin, or in azole-resistant strain; Hog1p, farnesol, alkaline downregulated; similar to S. cerevisiae Ddr48p
1.61017	6.98811	1.24453	5.98946		orf19.1691	Predicted ORF in Assemblies 19, 20 and 21; fluconazole-induced; filament induced; Hog1p-induced; regulated by Nrg1p, Tup1p; increased expression in response to prostaglandins
1.35844	6.31114	1.10935	4.54824	CAN2	orf19.111	Putative amino acid permease; transcription is regulated by Nrg1p and Tup1p; caspofungin induced; flucytosine induced; shows colony morphology-related gene regulation by Ssn6p; ; fungal-specific (no human or murine homolog)
1.86939	5.22653	4.4234	2.40598	SOD5	orf19.2060	Copper- and zinc-containing superoxide dismutase; protective role against oxidative stress; induced by neutrophil contact, hyphal growth, caspofungin, osmotic or oxidative stress; member of a gene family including SOD1, SOD4, SOD5, and SOD6
0.966244	4.92583	1.13349	5.52405	ERG6	orf19.1631	Delta(24)-sterol C-methyltransferase, converts zymosterol to fecosterol in ergosterol biosynthesis by methylating position C-24; mutation confers nystatin resistance; fluconazole-induced; transcription increased in azole-resistant strain
1.17069	4.41867	2.31687	2.34087	ALS1	orf19.5741	Adhesin; ALS family of cell-surface glycoproteins; adhesion, virulence roles; immunoprotective; in band at hyphal base; amyloid domain; biofilm-induced; Rfg1p, Ssk1p, growth-regulated; strain background affects expression
2.57173	4.35693	5.39869	1.70192	RTA2	orf19.24	Putative floppase; required for sphingolipid long chain base release; mediates calcineurin-dependent resistance to azoles; stress-associated protein; Ca2+, calcineurin-regulated; ketoconazole, caspofungin induced; Plc1p-regulated
1.17088	4.17088	1.27067	3.93233	ERG3	orf19.767	C-5 sterol desaturase; introduces C-5(6) double bond into episterol in ergosterol biosynthesis; clinically-isolated homozygous null mutants show azole resistance, defects in hyphal growth and virulence; Efg1p-repressed; fluconazole-induced
2.39588	4.11138	2.15159	4.79229		orf19.7296	Predicted ORF in Assemblies 19, 20 and 21; similar to stomatin mechanoreception protein; induced by Rgt1p
0.599839	3.57813	0.978587	2.49128	PGA7	orf19.5635	Protein described as a putative precursor of a hyphal surface antigen; putative GPI-anchor; induced by ciclopirox olamine, ketoconazole, or by Rim101p at pH 8; regulated during planktonic growth; induced during cell wall regeneration
1.07205	3.53629	1.01509	2.97495	ERG1	orf19.406	Squalene epoxidase, catalyzes epoxidation of squalene to 2,3(S)-oxidosqualene in the ergosterol biosynthetic pathway; essential; target of allylamine antifungal drugs; uses NADH as a reducing cofactor, while S. cerevisiae Erg1p uses NADPH
0.933471	3.52271	1.07621	2.89868	ERG10	orf19.1591	Protein similar to acetyl-CoA acetyltransferase; role in ergosterol biosynthesis; soluble in hyphae; changes in protein abundance associated with azole resistance; fluconazole or ketoconazole induced; macrophage-downregulated protein
0.670819	3.38556	1.08841	1.83314	NUP	orf19.6570	Nucleoside permease; adenosine and guanosine are substrates, whereas cytidine, adenine, guanine, uridine, uracil are not; similar to a nucleoside permease of S. pombe; possibly processed by Kex2p
1.41838	3.28501	1.57502	2.43966	PMC1	orf19.1727	Vacuolar calcium P-type ATPase; transcription is regulated by calcineurin and fluconazole; mutant shows increased resistance to fluconazole or lithium, and increased sensitivity to calcium
1.03765	3.19383	1.0915	3.38547	ERG24	orf19.1598	C-14 sterol reductase, has a role in ergosterol biosynthesis; mutation confers increased sensitivity to dyclonine
1.60904	3.10945	1.36041	3.92994	HGT1	orf19.4527	High-affinity glucose transporter, member of major facilitator superfamily; transcription induced by progesterone and by drugs including chloramphenicol and benomyl; likely essential for growth, based on an insertional mutagenesis strategy
1.24562	3.10654	1.02781	3.38329	SLD1	orf19.260	Sphingolipid delta-8 desaturase, catalyzes desaturation at carbon-8 in the long-chain base moiety of ceramides during glucosylceramide synthesis
1.12288	3.04087	1.54561	2.61382	ERG251	orf19.4631	Predicted ORF in Assemblies 19, 20 and 21; ketoconazole-induced; amphotericin B, caspofungin repressed
1.26195	3.02104	1.16428	3.10967		orf19.4013	Predicted ORF in Assemblies 19, 20 and 21
1.33154	2.98345	1.0914	3.82611		orf19.699	Predicted ORF in Assemblies 19, 20 and 21
1.53878	2.97538	0.795705	4.99355	GDH3	orf19.4716	Protein described as similar to NADP-glutamate dehydrogenase; hyphal downregulated expression; transcription is regulated by Nrg1p, Plc1p; downregulated by Efg1p; upregulated by Rim101p at pH 8; ciclopirox olamine induced
1.03922	2.96742	1.02007	3.22675	ERG11	orf19.922	Lanosterol 14-alpha-demethylase, member of cytochrome P450 family that functions in ergosterol biosynthesis; target of azole antifungals; may contribute to drug resistance; azole- or biofilm-induced; subject to hypoxic regulation
0.747213	2.88441	1.93714	0.985984	PHR1	orf19.3829	Glycosidase of cell surface; may act on cell-wall beta-1,3-glucan prior to beta-1,6-glucan linkage; E169 and E270 at active site; role in systemic but not vaginal virulence (neutral, not low pH); high pH or filamentation induced
1.66164	2.73952	1.14448	3.57294		orf19.5799	Predicted ORF in Assemblies 19, 20 and 21
1.83469	2.67929	0.950805	3.84977	DUR1,2	orf19.780	Urea amidolyase, contains urea carboxylase and allophanate hydrolase activities needed to hydrolyze urea to CO2; required for utilization of urea as nitrogen source and for hyphal switch in macrophages; transcription is regulated by Nrg1p
0.818357	2.62596	0.989644	2.6296	HGT2	orf19.3668	Putative glucose transporter of the major facilitator superfamily; the C. albicans glucose transporter family comprises 20 members; 12 probable membrane-spanning segments; expressed in rich medium with 2% glucose
0.920271	2.58675	0.921632	2.4202	ERG2	orf19.6026	C-8 sterol isomerase; enzyme of ergosterol biosynthesis pathway; converts fecosterol to episterol; mutant is hypersensitive to multiple drugs; ketoconazole-induced
1.23251	2.58237	1.11924	2.91334	ERG25	orf19.3732	Putative C-4 methyl sterol oxidase with role in C4-demethylation of ergosterol biosynthesis intermediates, based on similarity to S. cerevisiae Erg25p; fluconazole-induced; upregulated in biofilm and in azole-resistant strain
0.778071	2.56166	1.04533	2.02353		orf19.496	Predicted ORF in Assemblies 19, 20 and 21
1.68659	2.55311	2.07152	1.73983	SAP9	orf19.6928	Secreted aspartyl proteinase; roles in adhesion, cell surface integrity; induced by antifungal drugs, stationary phase, or in white-phase cells; farnesol-downregulated in biofilm; autocatalytic processing; GPI-anchor; N-glycosylated
1.1514	2.54588	1.52636	1.61427	BMT3	orf19.3282	Putative beta-mannosyltransferase, required for addition of the 2nd beta-mannose to the acid-stable fraction of cell wall phosphopeptidomannan and for elongation of beta-mannose chains on the phosphopeptidomannan acid-labile fraction
1.05436	2.53273	0.926522	3.12349	SET3	orf19.7221	Protein similar to S. cerevisiae Set3p, which is an NAD-dependent histone deacetylase; transposon mutation affects filamentous growth
0.889257	2.50346	0.974479	2.24367	OPT1	orf19.2602	Oligopeptide transporter; transports 3-to-5-residue peptides; alleles are distinct, one has intron; not ABC or PTR type transporter; suppresses S. cerevisiae ptr2-2 mutant defects; induced by BSA or peptides; Stp3p, Hog1p regulated
1.86694	2.48232	1.23402	3.38279		orf19.6840	Predicted ORF in Assemblies 19, 20 and 21; transcription is induced in response to alpha pheromone in SpiderM medium
1.79306	2.41314	2.01762	1.99675	FGR22	orf19.1586	Putative phosphatidylinositol-specific phospholipase C (PI-PLC); predicted type 2 membrane protein; no S. cerevisiae ortholog; role in, and regulated by, filamentation; no mouse systemic virulence role; almost identical to orf19.5797
0.824494	2.41162	1.18626	1.95499		orf19.4459	Predicted ORF in Assemblies 19, 20 and 21; similar to S. cerevisiae Ynl234wp, which is a putative heme-binding stress-related protein; transposon mutation affects filamentous growth
0.997699	2.40957	0.891956	2.22868	OPT9	orf19.2584	Probable pseudogene similar to fragments of OPT1 oligopeptide transporter gene; decreased expression in hyphae compared to yeast-form cells; transcriptionally induced upon phagocytosis by macrophage
1.28581	2.39222	1.49604	1.78837	MET13	orf19.2887	Predicted ORF in Assemblies 19, 20 and 21; ketoconazole-induced; amphotericin B repressed
1.01022	2.37976	1.40116	1.89892		orf19.4166	Predicted zinc-finger protein of unknown function
0.933687	2.34294	1.1437	2.6129	ERG4	orf19.5379	Protein described as similar to sterol C-24 reductase; shows Mob2p-dependent hyphal regulation; fluconazole-induced; caspofungin repressed
1.71582	2.33933	1.16346	2.81237		orf19.3483	Predicted ORF in Assemblies 19, 20 and 21; Plc1p-regulated
1.32005	2.33498	2.06801	1.12353	RTA3	orf19.23	Similar to S. cerevisiae Rta1p (role in 7-aminocholesterol resistance) and Rsb1p (flippase); putative membrane protein; putative drug-responsive regulatory site; induced by fluphenazine, estradiol, ketoconazole, caspofungin
1.07179	2.32948	0.971827	2.35103	ERG7	orf19.1570	2,3-epoxysqualene-lanosterol cyclase (lanosterol synthase), catalyzes the conversion of 2,3-oxidosqualene to lanosterol in sterol biosynthesis; fluconazole-induced
1.33387	2.30591	1.94524	1.6942	CRZ1	orf19.7359	Putative transcription factor; similar to S. cerevisiae calcineurin-regulated transcription factor Crz1p; mutant is fluconazole hypersensitive; likely to act downstream of calcineurin; has C2H2 zinc fingers; not required for mouse virulence
1.27549	2.28977	1.14354	1.96811	IDP2	orf19.3733	Putative isocitrate dehydrogenase; expression is regulated upon white-opaque switching; shows colony morphology-related gene regulation by Ssn6p; protein detected by mass spec in exponential and stationary phase cultures
0.966263	2.27846	0.910361	2.14451		orf19.1865	Predicted ORF in Assemblies 19, 20 and 21
0.655447	2.27187	0.962362	1.61453		orf19.6805	Predicted ORF in Assemblies 19, 20 and 21
1.01022	2.2659	0.985879	1.82994	ERG27	orf19.3240	3-Keto sterol reductase of ergosterol biosynthesis; acts in C-4 sterol demethylation with Erg25p and Erg26p; possible drug target, essential for viability; functional homolog of S. cerevisiae Erg27p
1.77749	2.25034	2.08176	1.83729	PI-PLC	orf19.5797	Phosphatidylinositol (PtdIns)-specific phospholipase C (PI-PLC); predicted type 2 membrane protein; role in, and regulated by, filamentation, Nrg1p and Tup1p; no mouse systemic virulence role; orf19.5797 and orf19.1586 are almost identical
3.07068	2.19717	2.03532	2.94639	STF2	orf19.2107.1	Protein involved in ATP biosynthesis; decreased expression in hyphae compared to yeast-form cells; downregulated by Efg1p; transcription is upregulated in clinical isolates from HIV+ patients with oral candidiasis
0.733314	2.18431	0.939153	1.3326	FRP1	orf19.5634	Predicted ferric reductase; gene alkaline-induced directly by Rim101p; iron-chelation-induced by CCAAT-binding factor (with Hap43p); fluconazole-downregulated; ciclopirox olamine induced; colony morphology-related gene regulation by Ssn6p
3.91942	2.17568	3.46317	2.00607		orf19.2959.1	ORF Predicted by Annotation Working Group
0.991846	2.16592	0.950331	1.71416	SNZ1	orf19.2947	Detected in stationary phase cultures; soluble in hyphae; induced on yeast to hyphal switch, in response to 3-aminotriazole, or in azole-resistant strain overexpressing MDR1; regulated by Gcn4p, macrophage; no human/murine homolog
1.32535	2.16407	1.00777	2.48191	ERG26	orf19.2909	C-3 sterol dehydrogenase, catalyzes the second of three steps required to remove two C-4 methyl groups from an intermediate in ergosterol biosynthesis; amphotericin B, caspofungin repressed
0.816078	2.16136	1.13348	1.98378	DIP5	orf19.2942	Putative permease for dicarboxylic amino acids; mutation confers hypersensitivity to toxic ergosterol analog; transcriptionally induced upon phagocytosis by macrophage; Gcn4p-regulated; upregulated by Rim101p at pH 8
0.887717	2.15949	1.02167	2.13217		orf19.5535	Predicted membrane transporter, member of the anion:cation symporter (ACS) family, major facilitator superfamily (MFS)
1.10464	2.1495	1.15528	1.84184		orf19.3984	Predicted ORF in Assemblies 19, 20 and 21; induced in core caspofungin response; increased expression observed in an ssr1 homozygous null mutant; induced by nitric oxide in yhb1 mutant
2.23661	2.13601	1.49947	3.2441	MEP1	orf19.1614	Ammonium permease; Mep1p is a more efficient ammonium permease than Mep2p, whereas Mep2p has additional regulatory role; not essential for viability; 11 predicted transmembrane regions; low mRNA abundance; hyphal downregulated
1.27627	2.12422	1.15166	2.77913	RPN4	orf19.1069	DNA binding protein with Cys2-His2 zinc-finger; putative regulator of proteasome genes; DNA recognition sequence (GAAGGCAAAA) enriched in regions upstream of proteasome genes; induced in core stress response
0.788609	2.08219	0.902671	2.23225	PGA45	orf19.2451	Cell wall protein; putative GPI-anchor; downregulated in core caspofungin response; Hog1p-induced; regulated by Ssn6p; Mob2p-dependent hyphal regulation; possibly spurious ORF (Annotation Working Group prediction)
1.00257	2.05327	2.2162	1.23405	CRH11	orf19.2706	Putative ortholog of S. cerevisiae Crh1p; predicted glycosyl hydrolase domain; similar to Csf4p, to antigenic Aspergillus fumigatus Aspf9; predicted Kex2p substrate; putative GPI-anchor; localizes to cell wall; caspofungin-induced
1.15791	2.0483	1.4591	1.81846		orf19.7566	Putative protein of unknown function, transcription is upregulated in clinical isolates from HIV+ patients with oral candidiasis; alkaline upregulated by Rim101p; fungal-specific (no human or murine homolog)
1.26869	2.04388	1.15428	2.3334		orf19.3737	Predicted ORF in Assemblies 19, 20 and 21; transcription is downregulated in response to treatment with ciclopirox olamine
1.89079	2.03503	1.40223	2.57944	IFU5	orf19.2568	Predicted membrane protein; estradiol-induced; increased transcription is associated with CDR1 and CDR2 overexpression or fluphenazine treatment; gene has putative drug-responsive regulatory site; similar to S. cerevisiae Wwm1p
1.38433	2.0145	1.47502	1.65137		orf19.13	Putative glucokinase; regulated upon yeast-hyphal switch; regulated by Efg1p; fluconazole-induced; induced in core stress response; shows colony morphology-related gene regulation by Ssn6p; merged with orf19.734 in Assembly 20
0.838	1.95351	0.932065	2.08813	ARG5,6	orf19.4788	Arginine biosynthetic enzyme activities; in S. cerevisiae, processed into distinct polypeptides with acetylglutamate kinase (Arg6p) activity and acetylglutamate-phosphate reductase (Arg5p) activity; Gcn4p regulated; alkaline downregulated
3.50177	1.91945	1.15967	4.8011	ASR1	orf19.2344	Protein described as similar to heat shock proteins; transcription regulated by cAMP, osmotic stress, ciclopirox olamine, ketoconazole; negatively regulated by Cyr1p, Ras1p; shows colony morphology-related gene regulation by Ssn6p
3.88681	1.85088	2.27571	2.35623		orf19.675	Similar to cell wall proteins; induced in core stress response, core caspofungin response; iron-regulated; amphotericin B induced; regulated by Cyr1p, Ssn6p; possibly spurious ORF (Annotation Working Group prediction)
3.01965	1.82638	1.22929	4.4072		orf19.1344	Predicted ORF in Assemblies 19, 20 and 21; fluconazole-induced; possibly spurious ORF (Annotation Working Group prediction)
2.01005	1.82635	1.24992	2.8128		orf19.7196	Protein described as a vacuolar protease; upregulated in the presence of human neutrophils
1.0264	1.81533	0.993115	2.05841	NCP1	orf19.2672	NADPH-cytochrome P450 reductase, acts with Erg11p in sterol 14 alpha-demethylation in ergosterol biosynthesis; subject to hypoxic regulation; ketoconazole-induced; caspofungin repressed
3.26874	1.79668	1.71641	2.68545		orf19.14	Predicted ORF from Assembly 19; removed from Assembly 20
1.24011	1.75029	1.07335	2.48179		orf19.7456	Predicted ORF in Assemblies 19, 20 and 21
1.77051	1.71785	0.996715	2.65321		orf19.2292	Oligopeptide transporter; transcriptionally induced upon phagocytosis by macrophage; fungal-specific (no human or murine homolog); merged with orf19.176 in Assembly 20
1.87757	1.67329	1.13235	2.54944	PEX4	orf19.4041	Predicted ORF in Assemblies 19, 20 and 21; transcription is upregulated in both intermediate and mature biofilms
1.70503	1.67315	1.21427	2.10554		orf19.1809	Predicted 3-hydroxyacyl-CoA epimerase; upregulated upon phagocytosis; transcription is regulated by Mig1p; expression is regulated upon white-opaque switching; merged with orf19.1288 in Assembly 20
2.60964	1.572	1.73475	2.1253		orf19.5045	Predicted ORF in Assemblies 19, 20 and 21; transcriptionally activated by Mnl1p under weak acid stress
1.80682	1.53873	1.12179	2.02327	PCL5	orf19.4012	Protein similar to S. cerevisiae Pcl5p and other cyclins for Pho85p kinase; Gcn4p-induced; suppresses toxicity of C. albicans Gcn4p overproduction in S. cerevisiae via increased Pho85p-dependent phosphorylation and degradation of Gcn4p
2.91076	1.50066	1.12027	3.3025		orf19.2244	Similar to oxidoreductases and to S. cerevisiae Yjr096wp; transcription is negatively regulated by Sfu1p; increased transcription is observed upon benomyl treatment; decreased expression observed in an ssr1 homozygous null mutant
1.70464	1.4588	1.30841	2.49408	BUL1	orf19.5094	Protein not essential for viability; macrophage/pseudohyphal-induced; similar to S. cerevisiae Bul1p, which may be involved in selection of substrates for ubiquitination
2.91044	1.45425	1.80464	2.14991		orf19.449	Predicted ORF in Assemblies 19, 20 and 21; possible phosphatidyl synthase; transcription reduced upon yeast-hyphal switch; protein detected by mass spec in stationary phase cultures
1.56853	1.4327	1.02607	2.34248		orf19.577	Predicted ORF in Assemblies 19, 20 and 21
1.71345	1.40273	1.08552	2.27223		orf19.6753	Predicted ORF in Assemblies 19, 20 and 21
3.39328	1.39806	1.28083	2.79085		orf19.7504	Predicted ORF in Assemblies 19, 20 and 21; Plc1p-regulated; induced in core caspofungin response
2.81643	1.39128	1.607	2.07922	CRZ2	orf19.2356	Putative transcription factor; zinc finger; similar to S. cerevisiae Crz1p; homozygous crz1, not crz2, null mutation suppresses fluconazole resistance of homozygous cka2 null (defective in CK2 kinase ); Rim101p-downregulated at pH 8
2.87776	1.39059	0.982008	6.35591	TNA1	orf19.4335	Putative nicotinic acid transporter; fungal-specific (no human or murine homolog); detected at germ tube plasma membrane by mass spectrometry; transcriptionally induced upon phagocytosis by macrophage
1.64128	1.37363	1.08858	2.33137	GAP6	orf19.6659	Putative general amino acid permease; Plc1p-regulated; Gcn4p-regulated; fungal-specific (no human or murine homolog)
1.86857	1.3683	0.952647	2.13663		orf19.4657	Predicted ORF in Assemblies 19, 20 and 21
0.904981	1.32735	0.445665	2.8702	ITR1	orf19.3526	Inositol transporter required for uptake of exogenous inositol; major facilitator superfamily; 12 probable transmembrane motifs; expressed in rich medium with 2% glucose; fluconazole, caspofungin downregulated
1.68622	1.32324	1.11779	2.14787	POT1	orf19.7520	Putative peroxisomal 3-oxoacyl CoA thiolase; transcription is regulated by Nrg1p and Mig1p; farnesol regulated
1.49863	1.3033	0.931865	2.01299	OPT4	orf19.176	Oligopeptide transporter; detected at germ tube plasma membrane by mass spectrometry; transcriptionally induced upon phagocytosis by macrophage; fungal-specific (no human or murine homolog); merged with orf19.2292 in Assembly 20
1.6712	1.2533	0.954943	2.07666		orf19.7457	Predicted ORF in Assemblies 19, 20 and 21; shows Mob2p-dependent hyphal regulation
2.24118	1.24611	1.15118	2.37318	LEU2	orf19.7080	Isopropyl malate dehydrogenase; enzyme of leucine biosynthesis; upregulated in the presence of human whole blood or polymorphonuclear (PMN) cells; protein level decreased in stationary phase cultures
1.38979	1.21184	0.960911	2.53588	ICL1	orf19.6844	Isocitrate lyase; enzyme of glyoxylate cycle; required for wild-type virulence in murine systemic infection; no mammalian homolog; gene induced upon phagocytosis by macrophage; farnesol regulated; Pex5p-dependent peroxisomal localization
2.96672	1.21095	1.20001	2.28563	RTA4	orf19.6595	Predicted ORF in Assemblies 19, 20 and 21; similar to S. cerevisiae Yor049cp, which is involved in fatty acid transport; transposon mutation affects filamentous growth; alkaline downregulated; caspofungin induced
1.71626	1.20469	1.06151	2.01395	ECM29	orf19.6773	Protein similar to S. cerevisiae Ecm29p; transposon mutation affects filamentous growth
2.45859	1.17422	1.23536	2.27513	LEU1	orf19.7498	Protein described as 3-isopropylmalate dehydratase; antigenic in human; decreased expression in hyphae compared to yeast-form cells; alkaline downregulated; upregulated in the presence of human whole blood or polymorphonuclear (PMN) cells
2.74266	1.07484	1.13572	2.47053		orf19.2049	Predicted ORF in Assemblies 19, 20 and 21; heterozygous null mutant displays sensitivity to virgineone
2.98317	1.0624	1.44857	2.00317	MET3	orf19.5025	Putative ATP sulfurlyase of sulfate assimilation; repressed by Met or Cys, Sfu1p, or in fluconazole-resistant isolate; strongly induced on biofilm formation, even in presence of Met and Cys; Hog1p-, caspofungin-, possibly adherence-induced
3.42982	1.02179	1.25453	2.45141	MET15	orf19.5645	O-acetylhomoserine O-acetylserine sulfhydrylase; involved in sulfur amino acid biosynthesis; immunogenic; Hog1p, biofilm, possibly adherence-induced; brown colony color of homozygous mutant in Pb(2+) medium is visual selection marker
2.48024	0.9831	1.07915	2.73307		orf19.1765	Predicted ORF in Assemblies 19, 20 and 21
0.545921	0.975065	0.851715	0.477178	URA7	orf19.3941	Predicted ORF in Assemblies 19, 20 and 21; flucytosine induced; protein detected by mass spec in exponential and stationary phase cultures
1.11891	0.926673	2.7039	0.485295	PGA13	orf19.6420	Putative GPI-anchored protein; described as similar to mucins; induced during cell wall regeneration, and during core caspofungin response; regulated by Tsa1p, Tsa1Bp in minimal media at 37 deg and by Cyr1p, Nrg1p, Tup1p, Rlm1p
0.432974	0.862702	0.85234	0.390475	RPA190	orf19.1839	Predicted ORF in Assemblies 19, 20 and 21;flucytosine induced
0.531107	0.831326	0.782326	0.453436	RPA135	orf19.7062	Predicted ORF in Assemblies 19, 20 and 21; decreased expression in response to prostaglandins
0.522679	0.823987	0.902548	0.480074	KRE30	orf19.2183	YEF3-subfamily ABC family protein, predicted not to be a transporter; downregulated during core stress response; mutation confers hypersensitivity to amphotericin B
0.649876	0.815899	1.51507	0.31639	PUT2	orf19.3974	Alkaline upregulated; protein detected by mass spec in exponential and stationary phase cultures
0.476238	0.802753	0.894185	0.489396		orf19.7215	Predicted ORF in Assemblies 19, 20 and 21
0.582613	0.786166	0.85087	0.499347	UTP8	orf19.5436	Essential protein involved in tRNA export from the nucleus and ribosomal small subunit biogenesis; physically interacts with TAP-tagged Nop1p
0.409791	0.777961	0.721394	0.474733	UTP21	orf19.1566	Predicted ORF in Assemblies 19, 20 and 21; physically interacts with TAP-tagged Nop1p
0.537608	0.745151	0.775581	0.481153	PWP2	orf19.3276	Predicted ORF in Assemblies 19, 20 and 21; downregulated during core stress response; decreased expression in response to prostaglandins; physically interacts with TAP-tagged Nop1p
0.584347	0.736309	0.853011	0.453934	CSI2	orf19.5232	Protein essential for growth; transposon mutation affects filamentous growth
1.04507	0.711825	1.53867	0.482938	PUT1	orf19.4274	Alkaline upregulated by Rim101p
0.601707	0.711416	0.779489	0.489703	DBP7	orf19.6902	Predicted ORF in Assemblies 19, 20 and 21; transcription is upregulated in both intermediate and mature biofilms
0.537395	0.704214	0.694486	0.4998		orf19.3393	Putative DEAD-box helicase
0.495479	0.693802	0.788737	0.470643		orf19.7011	Predicted ORF in Assemblies 19, 20 and 21
0.593811	0.690614	0.853652	0.457755	YTM1	orf19.4815	Protein similar to S. cerevisiae Ytm1p, which is involved in biogenesis of the large ribosomal subunit; transposon mutation affects filamentous growth; protein level decreased in stationary phase cultures
0.474444	0.688508	0.759753	0.480886	NOG1	orf19.7384	Predicted ORF in Assemblies 19, 20 and 21; mutation confers hypersensitivity to 5-fluorocytosine (5-FC), 5-fluorouracil (5-FU), and tubercidin (7-deazaadenosine); decreased expression in response to prostaglandins
0.552015	0.683076	0.719229	0.468672		orf19.7422	Predicted ORF in Assemblies 19, 20 and 21
0.503835	0.666033	0.693855	0.472057	ENP1	orf19.5507	Protein similar to S. cerevisiae Enp1p; transposon mutation affects filamentous growth; decreased expression in response to prostaglandins
0.903437	0.64836	1.05294	0.421848	GAP4	orf19.4456	Putative amino acid permease; hyphal induced; regulated by Gcn2p and Gcn4p; shows colony morphology-related gene regulation by Ssn6p; detected at plasma membrane of yeast-form and germ tube by mass spectrometry
0.70162	0.646246	0.909188	0.453541		orf19.6234	Predicted ORF in Assemblies 19, 20 and 21; mutation confers hypersensitivity to 5-fluorocytosine (5-FC), 5-fluorouracil (5-FU), and tubercidin (7-deazaadenosine)
0.350652	0.641769	0.756496	0.40749	NAG3	orf19.2158	Putative transporter of the major facilitator superfamily (MFS); similar to Nag4p; required for wild-type mouse virulence and cycloheximide resistance; in gene cluster that includes genes encoding enzymes of GlcNAc catabolism
0.837056	0.641027	0.865097	0.495416	FCA1	orf19.4195.1	Cytosine deaminase; enzyme of pyrimidine salvage; functional homolog of S. cerevisiae Fcy1p; mutation is associated with resistance to flucytosine (5-FC) in a clinical isolate; hyphal downregulated; gene has intron
0.893691	0.531699	1.14507	0.435122		orf19.3475	Described as a Gag-related protein; hyphal induced; downregulation correlates with clinical development of fluconazole resistance; repressed by nitric oxide, 17-beta-estradiol, ethynyl estradiol
1.16353	0.525523	1.54476	0.49899	FRE10	orf19.1415	Major cell-surface ferric reductase under low-iron conditions; 7 transmembrane regions and a secretion signal predicted; repressed by Tup1p, Rim101p, Ssn6p, Hog1p, caspofungin; ciclopirox olamine induced; not required for filamentous growth
0.88189	0.490475	1.40928	0.401482		orf19.6741	Predicted ORF in Assemblies 19, 20 and 21; regulated by Nrg1p, Tup1p
1.43814	0.448107	1.16892	0.47185		orf19.3448	Predicted ORF in Assemblies 19, 20 and 21; ketoconazole-repressed; possibly spurious ORF (Annotation Working Group prediction)
1.60288	0.341324	1.07168	0.478418	CHA1	orf19.1996	Protein similar to serine/threonine dehydratases, catabolic; negatively regulated by Rim101p; expression greater in low iron; regulated on white-opaque switching; filament induced; transposon mutation affects filamentous growth
