# Supplementary material for: Reverse Genetics in Candida albicans Predicts ARF Cycling Is Essential for Drug Resistance and Virulence
Source: PLoS Pathog. 2010 Feb 5;6(2):e1000753. doi: 10.1371/journal.ppat.1000753 (PMC2816695; doi:10.1371/journal.ppat.1000753)
Supplement: Table S11 — Plasmids used in this study. (0.03 MB XLS) [file ppat.1000753.s015.xls]

## Sheet: Sheet1
Table S11
Plasmids used in this study.
name	description
pSFS2A	SAT1 marker plasmid (Reuss et al.)
pEE25	AGE3 coding sequence cloned in pSFS2A
pEE27	downstream sequence of AGE3 cloned in pEE25
pEE43	AGE3 coding sequence in pEE25 replaced with upstream flanking sequence of AGE3
